# Supplementary material for: First principles studies of mononuclear and dinuclear Pacman complexes for electrocatalytic reduction of CO2
Source: Royal Society of Chemistry journal article supplement (doi:10.1039/d0cy01757d), 2020-11-05
Supplement: d0cy01757d1.pdf [file d0cy01757d1.pdf]

## Supporting information

### First Principle Studies of Mononuclear and Dinuclear Pacman Complexes for Electrocatalytic Reduction of CO<sub>2</sub>

Gurpreet Kour <sup>1,2</sup>, Xin Mao <sup>1,2</sup> and Aijun Du <sup>1,2</sup>\*

<sup>1</sup>Centre for Materials Science, Queensland University of Technology, Gardens Point  
Campus, Brisbane, QLD 4000, Australia

<sup>2</sup> School of Chemistry and Physics, Science and Engineering Faculty, Queensland University  
of Technology, Gardens Point Campus, Brisbane, QLD 4000, Australia

\*Corresponding Author: [aijun.du@qut.edu.au](mailto:aijun.du@qut.edu.au)

**Table S1:** shows the charge on carbon of the adsorbed CO<sub>2</sub> on the mononuclear and dinuclear complexes.

| X in complexes | M-X-Pac (charge on C in e) | Di-X-Pac (charge on C in e) |
|----------------|----------------------------|-----------------------------|
| Cr             | +0.75                      | +1.36                       |
| Mn             | +0.61                      | +0.98                       |
| Fe             | +0.49                      | +1.3                        |
| Co             | +1.11                      | +1.5                        |
| Ni             | +1.1                       | +1.8                        |

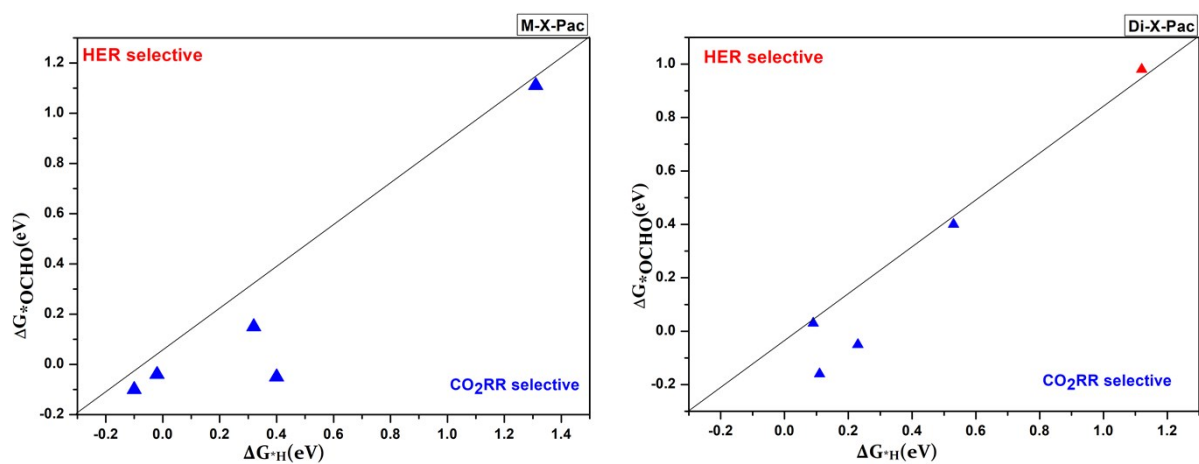

**Fig. S1:** Free energy for HER and the first hydrogenation step in CO<sub>2</sub>RR for M-X-Pac and Di-X-Pac.

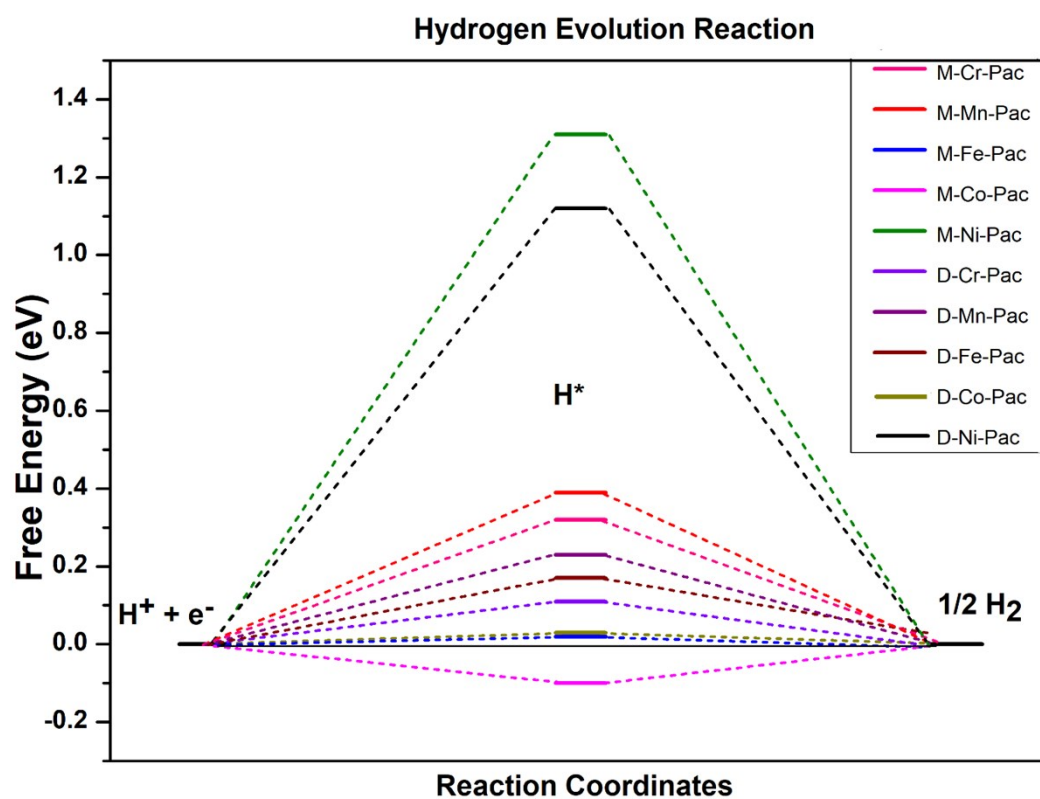

**Fig. S2:** The free energy diagram for HER (Hydrogen evolution reaction) on the surface of the M-X-Pac and Di-X-Pac.

**Table S2:** The calculated zero-point energies and entropy corrections of various adsorbed intermediates where \* indicates the catalyst.

| Adsorbed intermediates | $E_{ZPE}$ (eV) | TS (eV) |
|------------------------|----------------|---------|
| *CO <sub>2</sub>       | 0.30           | 0.39    |
| *OCHO                  | 0.60           | 0.23    |
| *COOH                  | 0.60           | 0.26    |
| *OCHOH                 | 0.91           | 0.35    |
| *CHO                   | 0.43           | 0.21    |
| *CH <sub>2</sub> O     | 0.73           | 0.32    |
| *CHOH                  | 0.76           | 0.21    |
| *CH <sub>3</sub> O     | 1.09           | 0.20    |
| *CH <sub>2</sub> OH    | 1.07           | 0.24    |
| *CH <sub>3</sub> OH    | 1.39           | 0.30    |

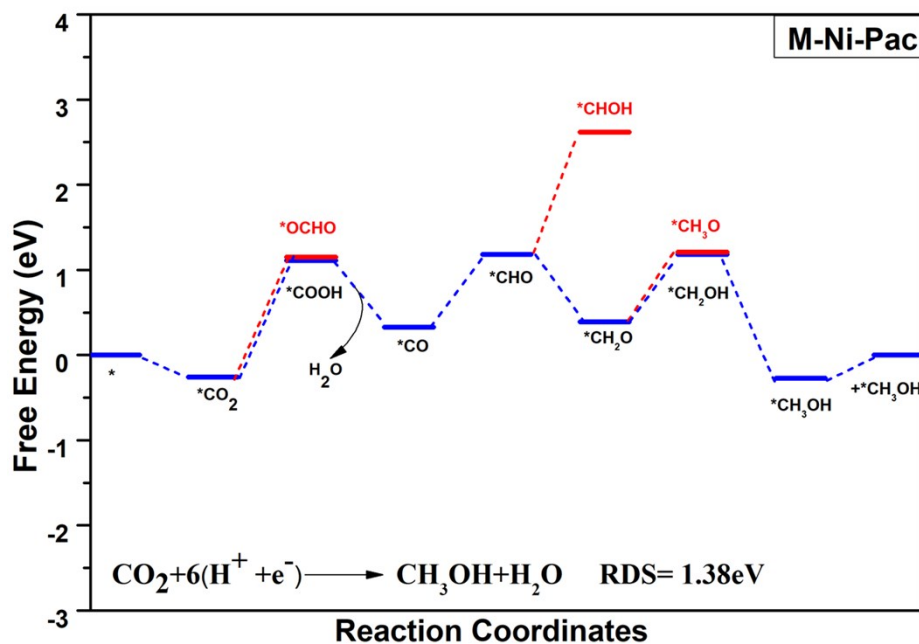

**Fig. S3:** Free energy diagram for the electrocatalytic reduction of  $\text{CO}_2$  to  $\text{CH}_3\text{OH}$  using mononuclear Pacman complexes M-Ni-Pac

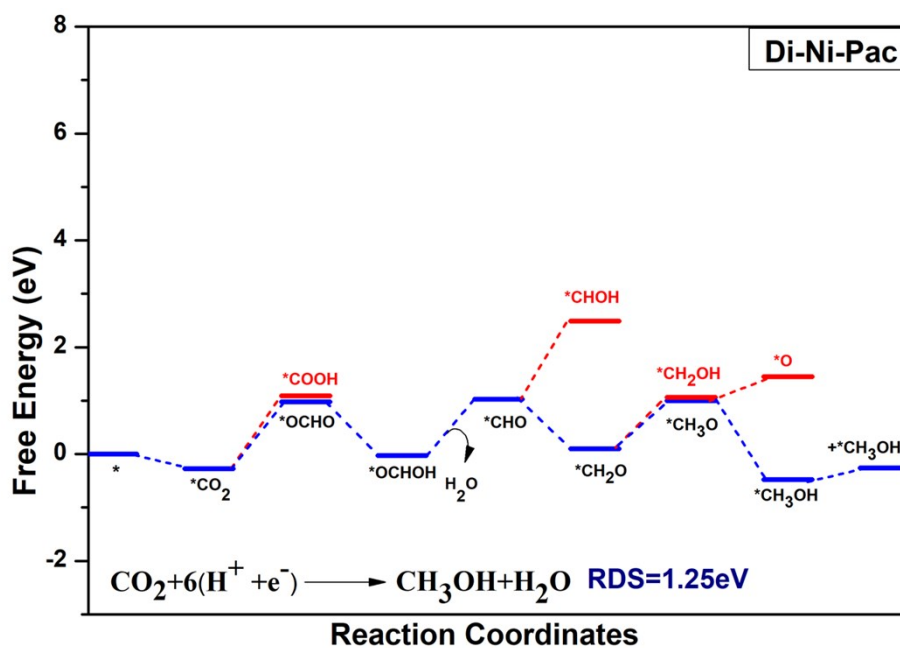

**Fig. S4:** Free energy diagram for the electrocatalytic reduction of  $\text{CO}_2$  to  $\text{CH}_3\text{OH}$  using Dinuclear Pacman complexes Di-Ni-Pac.

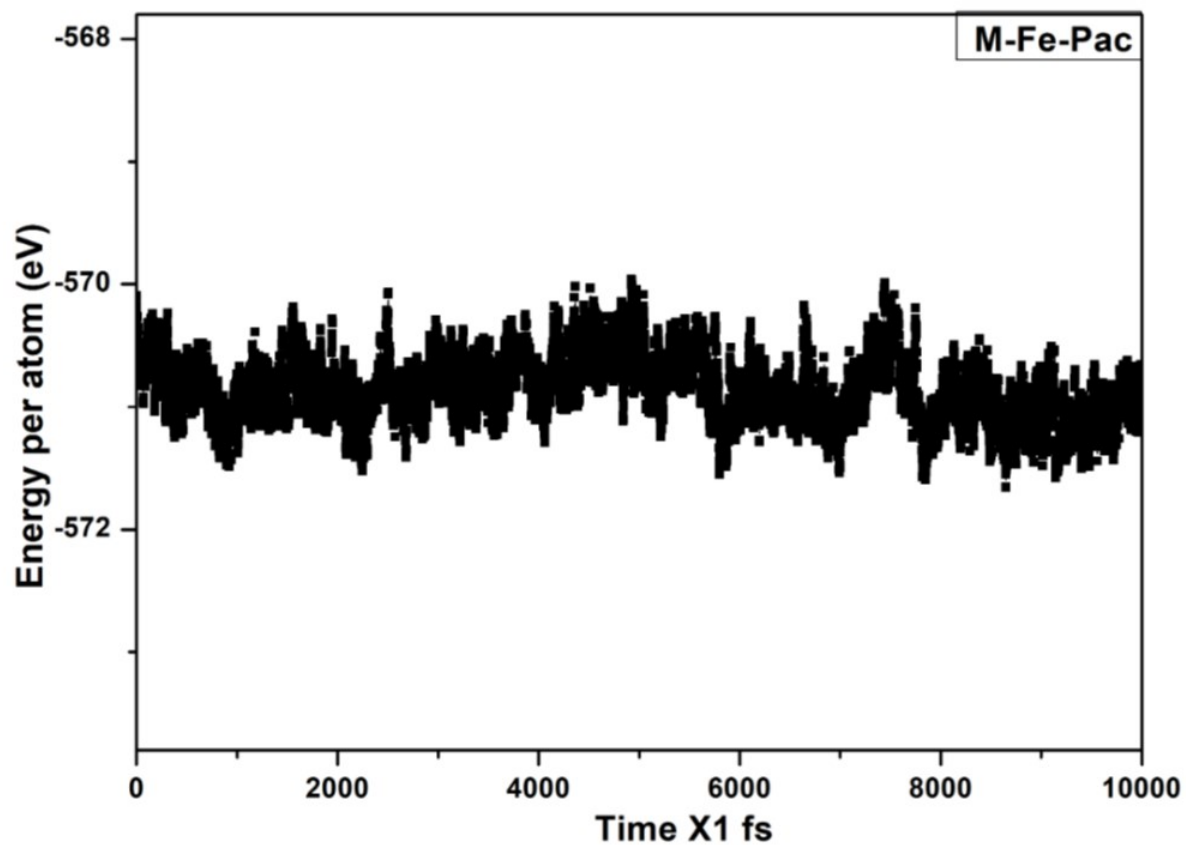

**Fig. S5:** Variation of energy per atom against the time for AIMD simulations for mononuclear iron pacman (M-Fe-Pac) complex. The simulation is run under 400K for 10ps with a time step of 1 fs.

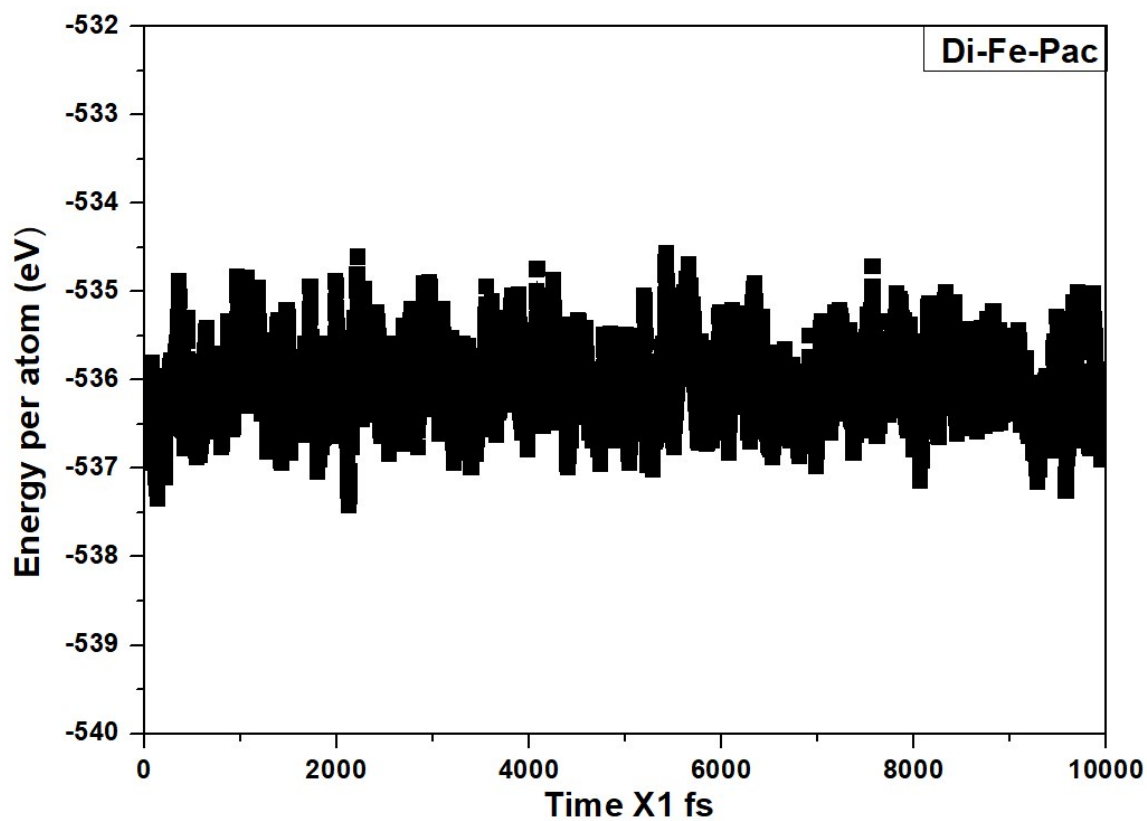

**Fig. S6:** Variation of energy per atom against the time for AIMD simulations for dinuclear iron pacman (Di-Fe-Pac) complex. The simulation is run under 400K for 10ps with a time step of 1 fs.
